# Supplementary material
Source: publisher figshare collection journal article supplement (https://sage.figshare.com/ndownloader/files/23882025)
Supplement: Supplementary file 1 [file 23882025]

## **APPENDIX A: Guiding Questions for Semi-Structured Interviews**

**Now I would like to get your feedback on your experience with the training that you attended.**

1. Think back to the naloxone (Narcan) training you attended at the library. What was the training like for you?
  - a. What part(s) of the training were most impactful?
  - b. What would you like to see added to future trainings?
2. Tell us about your level of comfort with recognizing and treating an overdose after attending the training.
3. Tell me about the reasons you attended the training. (If they don't know, prompt "there are many reasons that people attend naloxone trainings, including work-related reasons or a desire to help friends or family")
4. What are the best ways to get the word out to people about future trainings?

**Now I am going to ask you about your experience with naloxone after your training?**

5. Have you ever tried to purchase naloxone? (If no skip to 9 c.)
6. Were you successful in purchasing naloxone? (If no skip to 9 b.) \*\*If they successfully purchased naloxone one time, but were unsuccessful another time, take them through the question sequence for each instance,
  - a. Tell me about your experience.
    - i. What barriers did you face in getting naloxone prescription filled?
    - ii. Tell me about the factors that helped you to fill the prescription?
    - iii. What are some tips you would give a friend or family member who needs to obtain naloxone?
    - iv. Are you currently carrying naloxone?
      1. If yes, why do you carry it?
      2. If no, why don't you carry it?
    - v. How often do you carry it?
    - vi. Tell me about any experiences you have had using naloxone.
  - b. What prohibited you from purchasing it?
  - c. Tell me about why you have not tried to purchase naloxone.
7. Have you ever been in a situation where someone needed naloxone?
